# Supplementary material for: VirPipe: an easy-to-use and customizable pipeline for detecting viral genomes from Nanopore sequencing
Source: Oxford University Press journal article supplement (doi:10.1093/bioinformatics/btad293), 2023-05-01
Supplement: btad293_supplementary_data.zip [file btad293_supplementary_data.zip]

### Supplementary file 3. Sample analysis report

This sample report shows how raw output files generated by VirPipe can be compiled into a well-organized report. The report contains the output of VirPipe run with input Nanopore reads deposited in NCBI SRA with accession id SAMN31432881. Sample runs can be reproduced by following the instructions at <https://github.com/KijinKims/VirPipe/wiki/Reproducing-sample-results>.

|                                                                   |                         |
|-------------------------------------------------------------------|-------------------------|
| General summary                                                   |                         |
| Mean read length                                                  | 493.7                   |
| Mean read quality                                                 | 10.4                    |
| Median read length                                                | 418.0                   |
| Median read quality                                               | 10.4                    |
| Number of reads                                                   | 253,256.0               |
| Read length N50                                                   | 584.0                   |
| STDEV read length                                                 | 325.2                   |
| Total bases                                                       | 125,035,665.0           |
| Number, percentage and megabases of reads above quality cutoffs   |                         |
| >Q5                                                               | 253252 (100.0%) 125.0Mb |
| >Q7                                                               | 252802 (99.8%) 124.9Mb  |
| >Q10                                                              | 144217 (56.9%) 64.7Mb   |
| >Q12                                                              | 46914 (18.5%) 19.3Mb    |
| >Q15                                                              | 958 (0.4%) 0.2Mb        |
| Top 5 highest mean basecall quality scores and their read lengths |                         |
| 1                                                                 | 35.3 (5)                |
| 2                                                                 | 34.0 (8)                |
| 3                                                                 | 33.9 (3)                |
| 4                                                                 | 31.4 (16)               |
| 5                                                                 | 29.4 (3)                |
| Top 5 longest reads and their mean basecall quality score         |                         |
| 1                                                                 | 4929 (8.0)              |
| 2                                                                 | 4528 (8.4)              |
| 3                                                                 | 4411 (7.8)              |
| 4                                                                 | 4388 (8.7)              |
| 5                                                                 | 4383 (8.2)              |

Table 1. descriptive statistics of initial input reads from QC plot generated from qc step.

|                                                     |                     |
|-----------------------------------------------------|---------------------|
| Minimum read quality = 8, Minimum read length = 200 |                     |
| Before preprocessing                                | After preprocessing |
| 253256                                              | 209027              |

Table 2. The number of reads before/after preprocessing step.

|                                                     |                     |
|-----------------------------------------------------|---------------------|
| Minimum read quality = 8, Minimum read length = 200 |                     |
| Before preprocessing                                | After preprocessing |
| 209027                                              | 208917              |

Table 3. The number of reads before/after remove-host step.

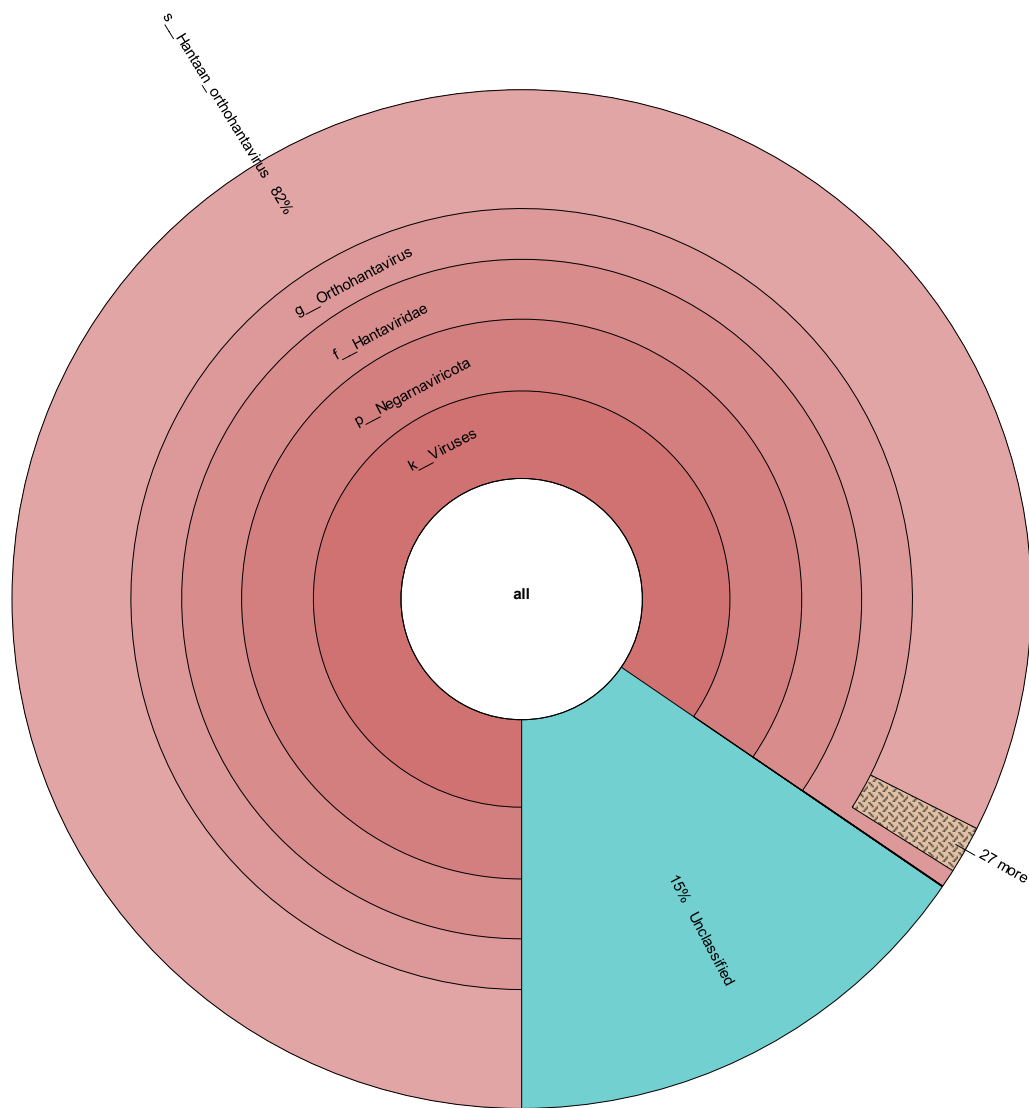

Figure 1. Krona chart generated in classify-taxonomy step.

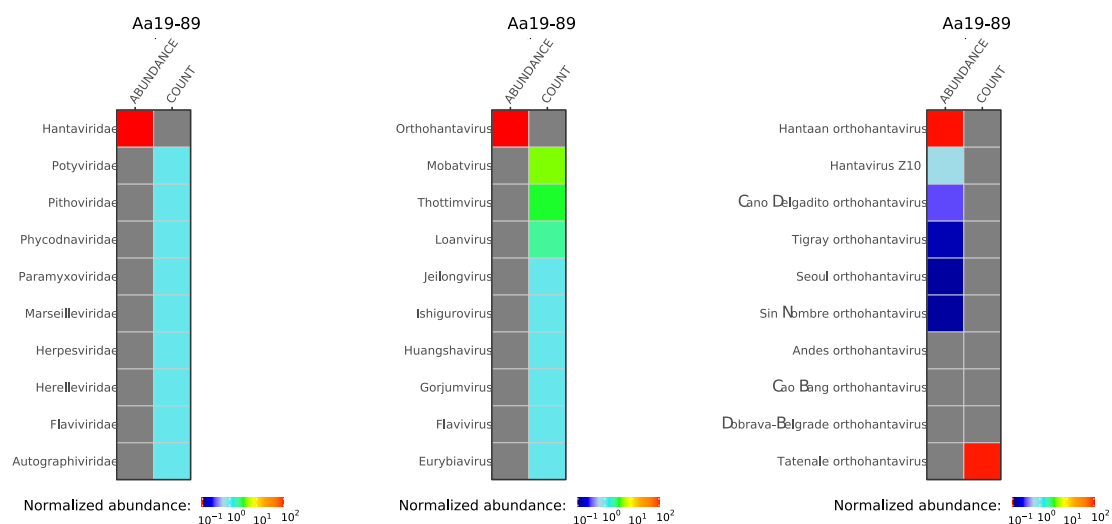

Figure 2. Heatmaps generated from the classify-taxonomy step.

From left to right, each indicates the classification result on the level of family, genus, and species.

| SEQ_NAME    | LEN  | N READS | N COVERED BASES | PERCENT COVERED | AVG COV | AVG BASEQ | AVG MAPQ |
|-------------|------|---------|-----------------|-----------------|---------|-----------|----------|
| M14626.1    | 1696 | 54003   | 1696            | 100             | 14806.9 | 19        | 54.8     |
| NC_005219.1 | 3616 | 76445   | 3615            | 99.9723         | 8676.46 | 19.3      | 50.9     |
| NC_005222.1 | 6533 | 89263   | 6346            | 97.1376         | 4656.72 | 19.3      | 48.7     |
| NC_038939.1 | 6559 | 306     | 1082            | 16.4964         | 17.3414 | 21.1      | 6.39     |

Table 4. summary of mapping results from map step. For the top three entries, from top to bottom, each corresponds to the reference sequence of the L, M, and S segment of *Hantaan Orthohantavirus* (HTNV). The last entry corresponds to the reference sequence of the L segment of *Prospect Hill virus*, which belongs to the Family *Hantaviridae* along with HTNV.

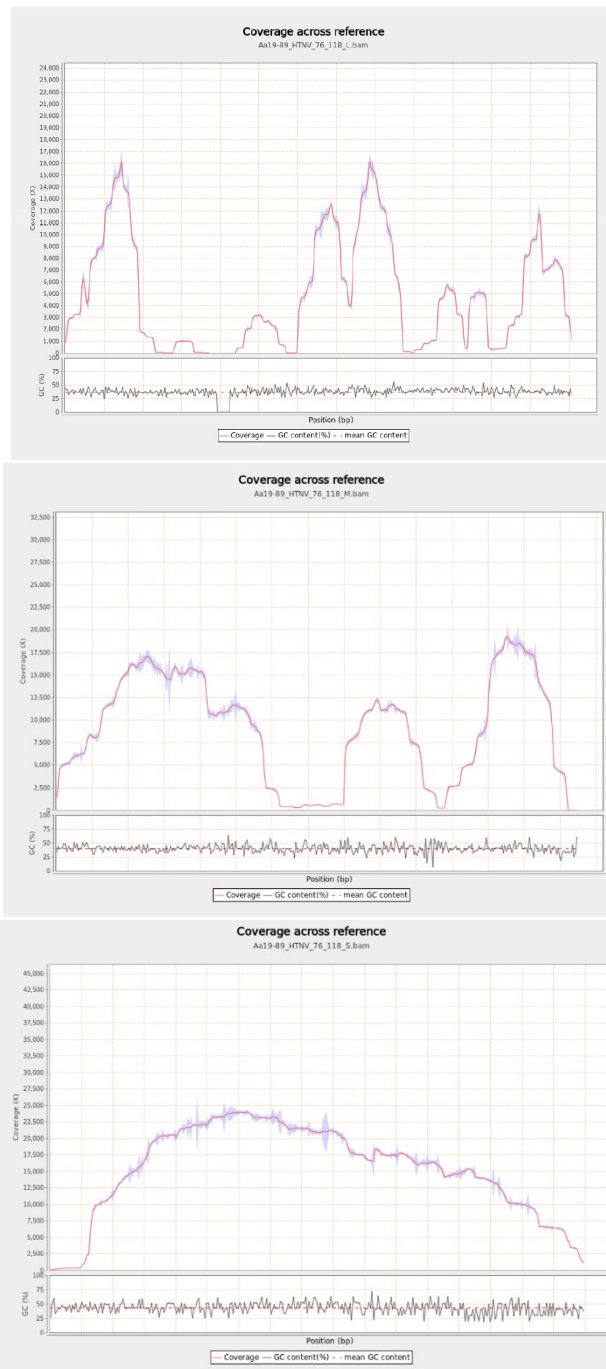

Figure 3. coverage across reference plots from Qualimap reports generated from map step. From top to bottom, each corresponds to the mapping result of input reads onto the reference sequence of the L, M, and S segment of *Hantaan Orthohantavirus* (HTNV).

| superkingdom | phylum          | class          | order        | family       | genus           | species                 | TAX_ID  | REF_ID                      | REF_TITLE                                | QUERY_ID | REF_ID.1                    | EVALUE | BITSCORE |
|--------------|-----------------|----------------|--------------|--------------|-----------------|-------------------------|---------|-----------------------------|------------------------------------------|----------|-----------------------------|--------|----------|
| All          | All             | All            | All          | All          | All             | All                     | All     | All                         | All                                      | All      | All                         | All    | All      |
| Viruses      | Negarnaviricota | Ellioviricetes | Bunyavirales | Hantaviridae | Orthohantavirus | Hantaan orthohantavirus | 1980471 | gi 38371710 ref NC_005218.1 | Hantaan virus, complete genome           | tig13    | gi 38371710 ref NC_005218.1 | 0      | 2316     |
| Viruses      | Negarnaviricota | Ellioviricetes | Bunyavirales | Hantaviridae | Orthohantavirus | Hantaan orthohantavirus | 1980471 | gi 38371712 ref NC_005219.1 | Hantaan virus, complete genome           | tig17    | gi 38371712 ref NC_005219.1 | 0      | 2124     |
| Viruses      | Negarnaviricota | Ellioviricetes | Bunyavirales | Hantaviridae | Orthohantavirus | Hantaan orthohantavirus | 1980471 | gi 38371710 ref NC_005218.1 | Hantaan virus, complete genome           | tig60    | gi 38371710 ref NC_005218.1 | 0      | 1914     |
| Viruses      | Negarnaviricota | Ellioviricetes | Bunyavirales | Hantaviridae | Orthohantavirus | Hantaan orthohantavirus | 1980471 | gi 38371710 ref NC_005218.1 | Hantaan virus, complete genome           | tig40    | gi 38371710 ref NC_005218.1 | 0      | 1801     |
| Viruses      | Negarnaviricota | Ellioviricetes | Bunyavirales | Hantaviridae | Orthohantavirus | Hantaan orthohantavirus | 1980471 | gi 38371716 ref NC_005222.1 | Hantaan virus segment L, complete genome | tig46    | gi 38371716 ref NC_005222.1 | 0      | 1751     |
| Viruses      | Negarnaviricota | Ellioviricetes | Bunyavirales | Hantaviridae | Orthohantavirus | Hantaan orthohantavirus | 1980471 | gi 38371710 ref NC_005218.1 | Hantaan virus, complete genome           | tig1     | gi 38371710 ref NC_005218.1 | 0      | 1681     |
| Viruses      | Negarnaviricota | Ellioviricetes | Bunyavirales | Hantaviridae | Orthohantavirus | Hantaan orthohantavirus | 1980471 | gi 38371710 ref NC_005218.1 | Hantaan virus, complete genome           | tig5     | gi 38371710 ref NC_005218.1 | 0      | 1657     |
| Viruses      | Negarnaviricota | Ellioviricetes | Bunyavirales | Hantaviridae | Orthohantavirus | Hantaan orthohantavirus | 1980471 | gi 38371712 ref NC_005219.1 | Hantaan virus, complete genome           | tig34    | gi 38371712 ref NC_005219.1 | 0      | 1648     |
| Viruses      | Negarnaviricota | Ellioviricetes | Bunyavirales | Hantaviridae | Orthohantavirus | Hantaan orthohantavirus | 1980471 | gi 38371710 ref NC_005218.1 | Hantaan virus, complete genome           | tig64    | gi 38371710 ref NC_005218.1 | 0      | 1646     |
| Viruses      | Negarnaviricota | Ellioviricetes | Bunyavirales | Hantaviridae | Orthohantavirus | Hantaan orthohantavirus | 1980471 | gi 38371712 ref NC_005219.1 | Hantaan virus, complete genome           | tig17    | gi 38371712 ref NC_005219.1 | 0      | 1607     |

Figure 4. partial result of megablast from blast step.
